# Supplementary material for: Feature Engineering and a Proposed Decision-Support System for Systematic Reviewers of Medical Evidence
Source: PLoS One. 2014 Jan 27;9(1):e86277. doi: 10.1371/journal.pone.0086277 (PMC3903545; doi:10.1371/journal.pone.0086277)
Supplement: Results S1 — Review by Feature Set Results. A more detailed presentation of the performance results for B|A and A|B independent tests, as well as mean performance. Results are presented for each systematic review by feature set. This table includes baseline F3 values, best parameter sets, recall, precision, F3, classification error, reduction in screening burden, and number of misclassified citations. (XLSX) [file pone.0086277.s001.xlsx]

## Sheet: Sheet1
REVIEW by FEATURE SET RESULTS S1 F3 = harmonic mean of recall (R) and precision (P); R is overweighted relative to P; beta = 3. (See text by Manning, Raghavan, and Schutze, "Introduction to Information Retrieval," 2008.) RSB = Reduction in screening burden for the second pass through the citations = (100% - Mean Classification Error %) FP = false positive FN = false negative n = normalization s =…
ALPHANUMERIC	Best parameter set	R (%)	P (%)	F3 (%)	Classification Error (%)	RSB (%)	FP + FN
INFLUENZA
B given model A	n=true; s=0.001	73.01	36.17	66.26	9.28		254
A given model B	n=true; s=0.001	79.87	23.98	64.77	15.33		421
MN performance		76.44	30.075	65.515	12.305	87.695	337.5
MALARIA
B given model A	n=true; s=0.001	88.7	71.36	86.6	5.84		83
A given model B	n=true; s=0.001	93.26	66.14	89.58	6.81		97
MN performance		90.98	68.75	88.09	6.325	93.675	90
GALACTOMANNAN
B given model A	n=false; s=0.250	93.62	73.33	91.1	1.73		19
A given model B	n=false; s=0.250	85.11	71.43	83.51	2.09		23
MN performance		89.365	72.38	87.305	1.91	98.09	21
ORGAN TRANSPLANT
B given model A	n=true; s=0.001	66.26	42.48	62.74	5.56		300
A given model B	n=false; s=0.250	53.28	49.62	52.89	4.56		246
MN performance		59.77	46.05	57.815	5.06	94.94	273
AMELOBLASTOMA
B given model A	n=true; s=0.001	79.31	42.2	72.9	7.91		75
A given model B	n=true; s=0.001	80.7	56.1	77.31	5.41		47
MN performance		80.005	49.15	75.105	6.66	93.34	61
ALPHABETIC	Best parameter set	R (%)	P (%)	F3 (%)	Classification Error (%)	RSB (%)	FP + FN
INFLUENZA
B given model A	n=false; s=0.250	57.67	45.85	56.22	6.57		180
A given model B	n=false; s=0.250	61.69	38.15	58.1	7.75		213
MN performance		59.68	42	57.16	7.16	92.84	196.5
MALARIA
B given model A	n=true; s=0.250	93.22	54.82	87.12	10.41		148
A given model B	n=false; s=0.250	98.31	56.27	91.48	9.76		139
MN performance		95.765	55.545	89.3	10.085	89.915	143.5
GALACTOMANNAN
B given model A	n=false; s=0.001	95.74	60.81	90.54	2.82		31
A given model B	n=true; s=0.250	97.87	55.42	90.91	3.45		38
MN performance		96.805	58.115	90.725	3.135	96.865	34.5
ORGAN TRANSPLANT
B given model A	n=false; s=0.250	71.6	32.71	63.99	7.91		427
A given model B	n=false; s=0.250	72.13	33.78	64.78	7.65		413
MN performance		71.865	33.245	64.385	7.78	92.22	420
AMELOBLASTOMA
B given model A	n=false; s=0.250	82.76	44.04	76.07	7.49		71
A given model B	n=false; s=0.250	77.19	48.89	72.97	6.8		59
MN performance		79.975	46.465	74.52	7.145	92.855	65
TOPICS + 2 KL DIVERGENCES	Best parameter set	R (%)	P (%)	F3 (%)	Classification Error (%)	RSB (%)	FP + FN
INFLUENZA
B given model A	T=1600; n=false; s=0.001	69.33	27.36	60.11	12.78		350
A given model B	T=1600; n=false; s=0.001	77.92	24.29	63.83	14.85		408
MN performance		73.625	25.825	61.97	13.815	86.185	379
MALARIA
B given model A	T=900; n=false; s=0.001	91.53	49.85	84.46	12.52		178
A given model B	T=900; n=false; s=0.001	96.07	51.35	88.37	11.87		169
MN performance		93.8	50.6	86.415	12.195	87.805	173.5
GALACTOMANNAN
B given model A	T=600; n=false; s=0.001	95.74	23.32	73.05	13.65		150
A given model B	T=600; n=false; s=0.001	97.87	25.7	76.41	12.18		134
MN performance		96.805	24.51	74.73	12.915	87.085	142
ORGAN TRANSPLANT
B given model A	T=1900; n=false; s=0.001	73.66	20.41	58.42	14.12		762
A given model B	T=1900; n=false; s=0.001	76.23	20.48	59.92	14.45		780
MN performance		74.945	20.445	59.17	14.285	85.715	771
AMELOBLASTOMA
B given model A	T=600; n=false; s=0.001	77.59	37.5	70.09	9.28		88
A given model B	T=600; n=false; s=0.001	78.95	43.27	72.93	8.18		71
MN performance		78.27	40.385	71.51	8.73	91.27	79.5
SR CONCEPTS	Best parameter set	R (%)	P (%)	F3 (%)	Classification Error (%)	RSB (%)	FP+FN
INFLUENZA
B given model A	n=false; s=0.250	76.69	20.76	60.42	18.81		515
A given model B	n=false; s=0.750	75.97	18.87	58.33	19.66		540
MN performance		76.33	19.815	59.375	19.235	80.765	527.5
MALARIA
B given model A	n=false; s=0.500	88.7	42.9	80.14	16.1		229
A given model B	n=false; s=0.500	96.63	44.56	86.52	15.45		220
MN performance		92.665	43.73	83.33	15.775	84.225	224.5
GALACTOMANNAN
B given model A	n=false; s=1.000	95.74	30.2	78.67	9.65		106
A given model B	n=false; s=0.750	95.74	30.82	79.09	9.36		103
MN performance		95.74	30.51	78.88	9.505	90.495	104.5
ORGAN TRANSPLANT
B given model A	n=true; s=0.500	81.89	13.3	54.03	24.84		1341
A given model B	n=false; s=0.250	66.39	20.8	54.45	12.95		699
MN performance		74.14	17.05	54.24	18.895	81.105	1020
AMELOBLASTOMA
B given model A	n=true; s=0.250	93.1	15.88	62.65	30.59		290
A given model B	n=false; s=0.500	82.46	37.9	73.78	10.02		87
MN performance		87.78	26.89	68.215	20.305	79.695	188.5
INDEXING TERMS	Best parameter set	R (%)	P (%)	F3 (%)	Classification Error (%)	RSB (%)	FP + FN
INFLUENZA
B given model A	n=false; s=0.250	74.23	23.54	61.08	15.89		435
A given model B	n=false; s=0.500	81.17	23.45	65.14	15.91		437
MN performance		77.7	23.495	63.11	15.9	84.1	436
MALARIA
B given model A	n=false; s=0.250	86.44	44.87	79.11	14.91		212
A given model B	n=false; s=0.500	94.94	42.68	84.58	16.57		236
MN performance		90.69	43.775	81.845	15.74	84.26	224
GALACTOMANNAN
B given model A	n=false; s=0.250	89.36	23.86	70.12	12.65		139
A given model B	n=false; s=0.250	95.74	29.41	78.13	10		110
MN performance		92.55	26.635	74.125	11.325	88.675	124.5
ORGAN TRANSPLANT
B given model A	n=true; s=0.250	88.48	10.25	50.18	35.4		1911
A given model B	n=false; s=0.250	72.13	17.39	54.86	16.75		904
MN performance		80.305	13.82	52.52	26.075	73.925	1407.5
AMELOBLASTOMA
B given model A	n=false; s=0.250	79.31	25.84	65.71	15.19		144
A given model B	n=true; s=1.000	84.21	30.57	71.64	13.59		118
MN performance		81.76	28.205	68.675	14.39	85.61	131
